# Supplementary material for: Invadopodia enable cooperative invasion and metastasis of breast cancer cells
Source: Research Square preprint supplement (doi:10.21203/rs.3.rs-632734/v1), 2021-06-25
Supplement: Supplementary file 1 [file ec0580dcdd0ffb804e9f8b3d.docx]

Supplementary Materials for

**Invadopodia enable cooperative invasion and metastasis of breast cancer cells**

L. Perrin, B. Bayarmagnai,E. Tüzel, B. Gligorijevic*

*Corresponding author. Email: [bojana.gligorijevic@temple.edu](mailto:bojana.gligorijevic@temple.edu)

**This PDF file includes:**

Figs. S1 to S9

Table S1

**Other Supplementary Materials for this manuscript include the following:**

Movies S1 to S10

**
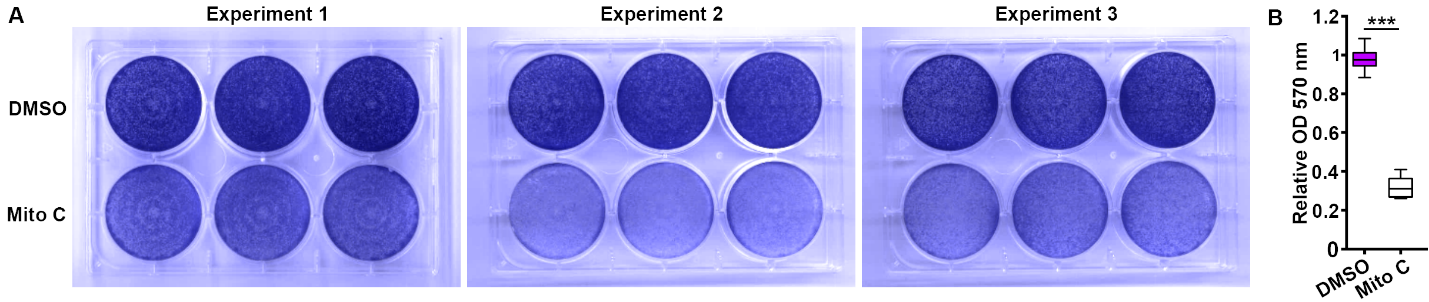
Figure S1**

**Figure S1.** (**A**) Visualization of crystal violet staining of 4T1 cells after 2 days of treatment with DMSO (top wells) or mitomycin C (Mito C, bottom wells). 3 independent experiments were conducted. (**B**) Quantification of the optical density (OD) measured at 570 nm, which results from solubilized crystal violet in 4T1 cells from (A). *P*=2.54x10-12 was obtained by the t-test. Data are represented as boxplots with median (line), 25th/75th percentiles (boxes) and maximum/minimum (whiskers). Statistical significance was defined as *p<0.05, **p<0.01 and ***p<0.001.


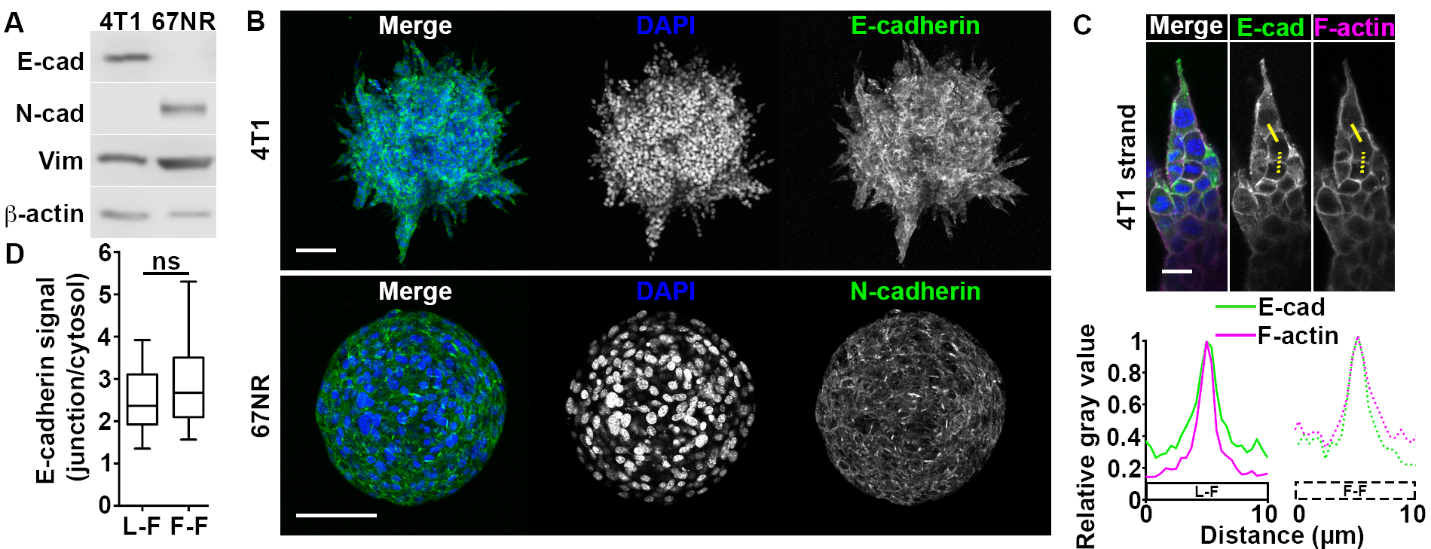
**Figure S2**

**Figure S2**. (**A**) Western blot analysis of E/N-cadherin (E/N-cad) and vimentin (vim) expression levels in 4T1 and 67NR cells. β-actin is used as a loading control. (**B**) Representative micrographs (maximum projection) of 4T1 and 67NR spheroids grown in a 3D collagen I matrix for 2 days, immunolabeled for E/N-cadherin (green) and with labeled nuclei (DAPI, blue). Scale bars: 100 µm. (**C**) Representative micrographs of a 4T1 strand 2 days after the spheroid was embedded in a 3D collagen I matrix. The spheroid was immunolabeled for E-cadherin (E-cad, green), and F-actin (phalloidin, magenta) and nuclei (DAPI, blue) were stained. Bottom panels show the relative E-cadherin (E-cad, green) an F-actin (magenta) signals along the solid (leader cell-follower cell (L-F) junction) and dashed (follower cell-follower cell (F-F) junction) yellow lines. Scale bar: 20 µm. (**D**) Quantification of the E-cadherin signal at L-L and F-F cell junctions from (C), as the signal ratio at the junction over cytosol. *P*=0.309 was obtained by the Wilcoxon rank sum test. Data are represented as boxplots with median (line), 25th/75th percentiles (boxes) and maximum/minimum (whiskers). Statistical significance was defined as *p<0.05, **p<0.01 and ***p<0.001.


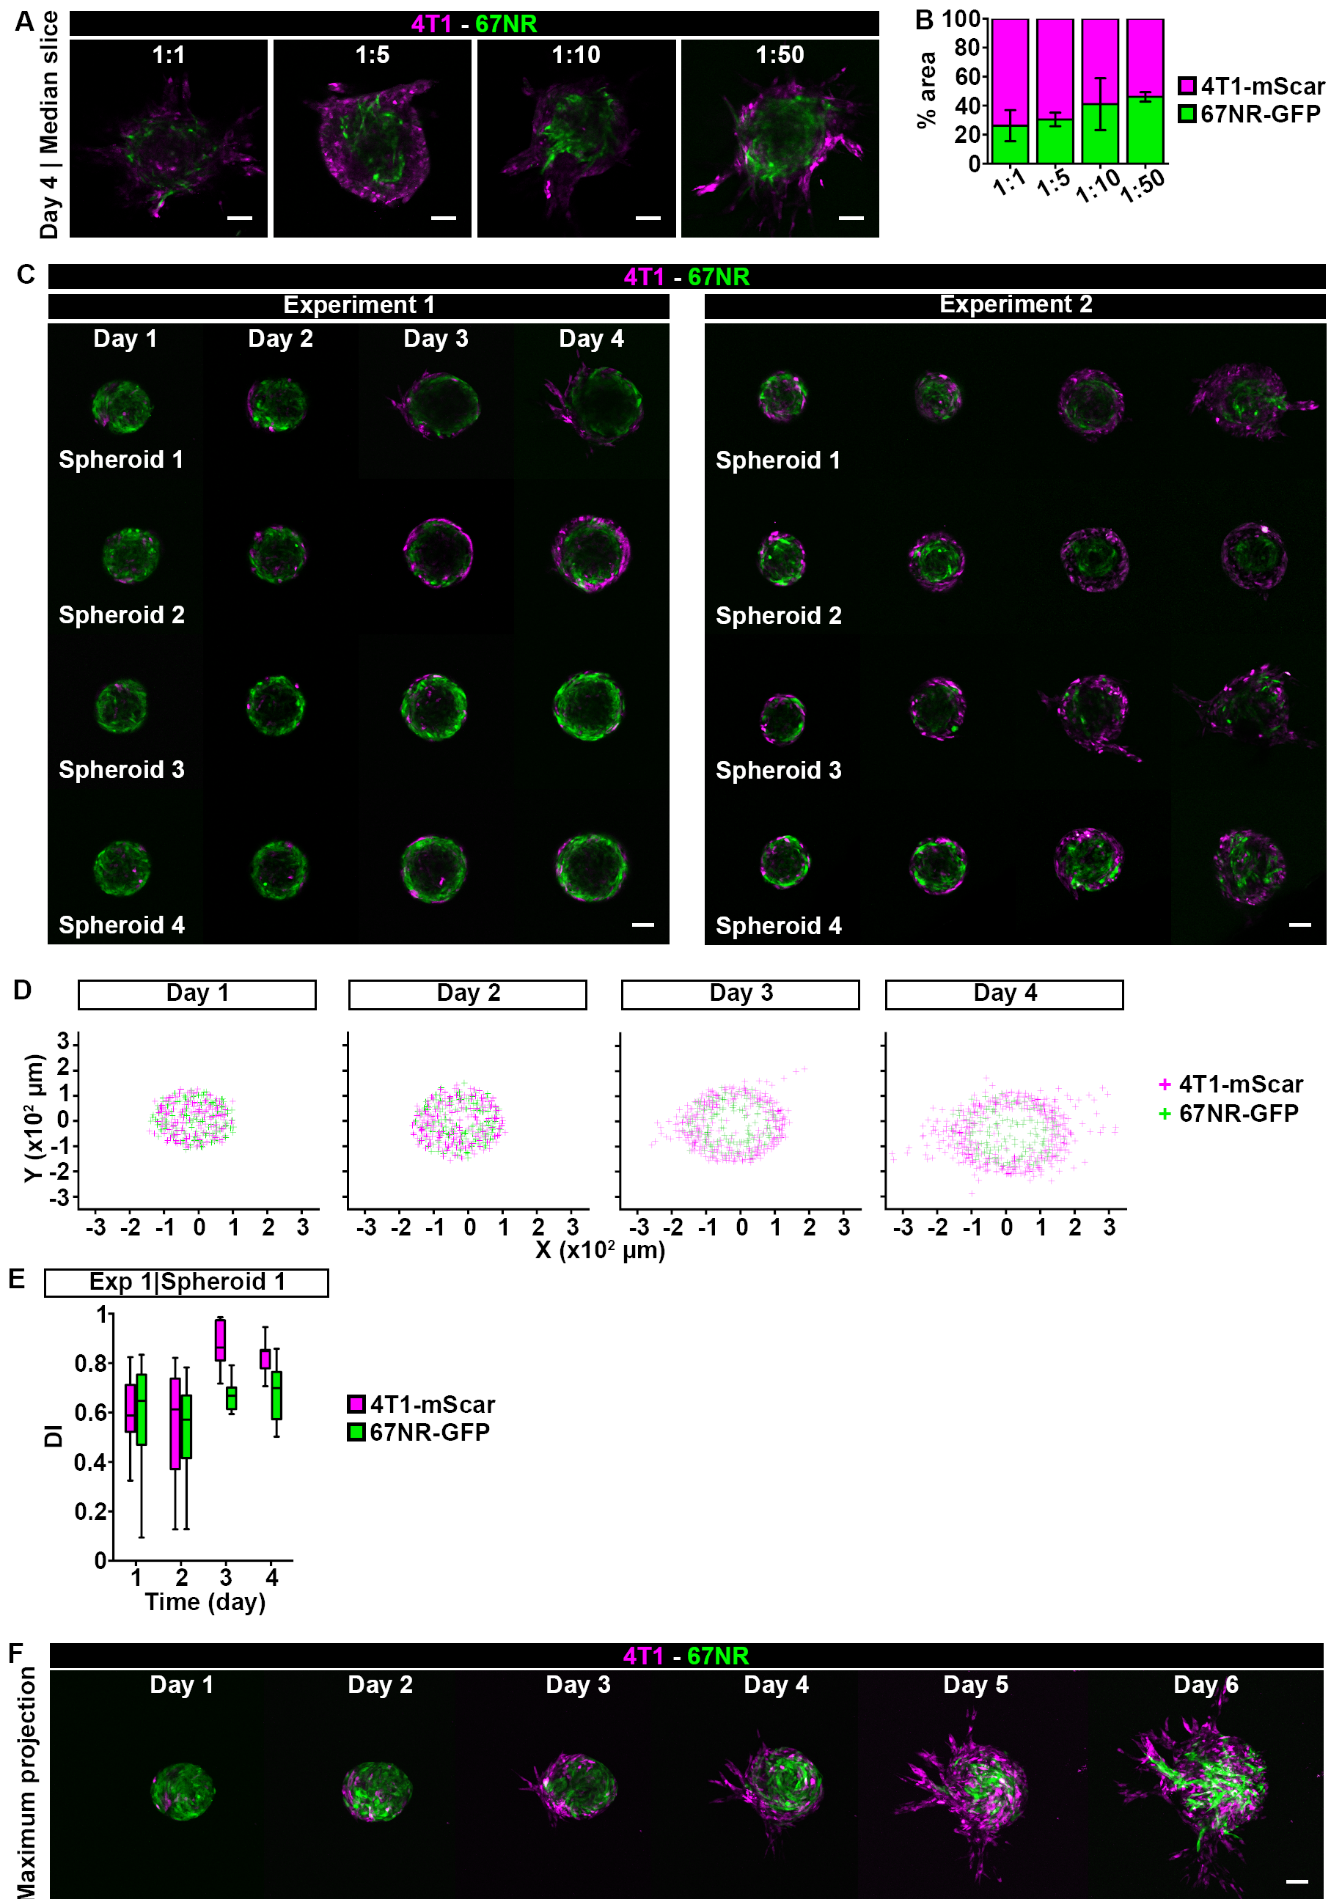
**Figure S3**

Figure S3. (A) Representative micrographs (median slice) of 4T1-mScarlet:67NR-GFP mixed spheroid grown in a 3D collagen I matrix for 4 days. Mixed spheroids were made with varying ratios of 4T1-mScarlet (magenta) to 67NR-GFP (green) cells, as indicated. Scale bars: 100 µm. (B) Quantification of the percent area occupied by 4T1-mScarlet (4T1-mScar, magenta bars) and 67NR-GFP (green bars) cells in the mixed spheroids from (A). Data are represented as a stacked bar graph with mean and standard error. (C) Micrographs (median slice) of all mixed spheroids used in Fig. 2B and 2D. Scale bars: 100 µm. (D) Relative coordinates of 4T1-mScarlet (4T1-mScar, magenta crosses) and 67NR-GFP (green crosses) cells from all mixed spheroids presented in (A) and Fig. S3C, including cells in invasion strands. (E) Quantification of the Distance Index (DI; relative distance of each cell to the spheroid center, see Materials and Methods) for 4T1-mScarlet (4T1-mScar, magenta boxes) and 67NR-GFP (green boxes) cells from spheroid 1 in experiment 1 from (C). Data are represented as boxplots with median (line), 25th/75th percentiles (boxes) and maximum/minimum (whiskers). (F) Representative micrographs (maximum projection) of a mixed spheroid, with a 1 to 50 ratio of 4T1-mScarlet (magenta) to 67NR-GFP (green) cells, grown in a 3D collagen I matrix and imaged daily. This spheroid corresponds to Fig. 2A. “Day 1” indicates the day 1 post embedding. Scale bar: 100 µm. Data are represented as boxplots with median (line), 25th/75th percentiles (boxes) and maximum/minimum (whiskers).

**Figure S4**
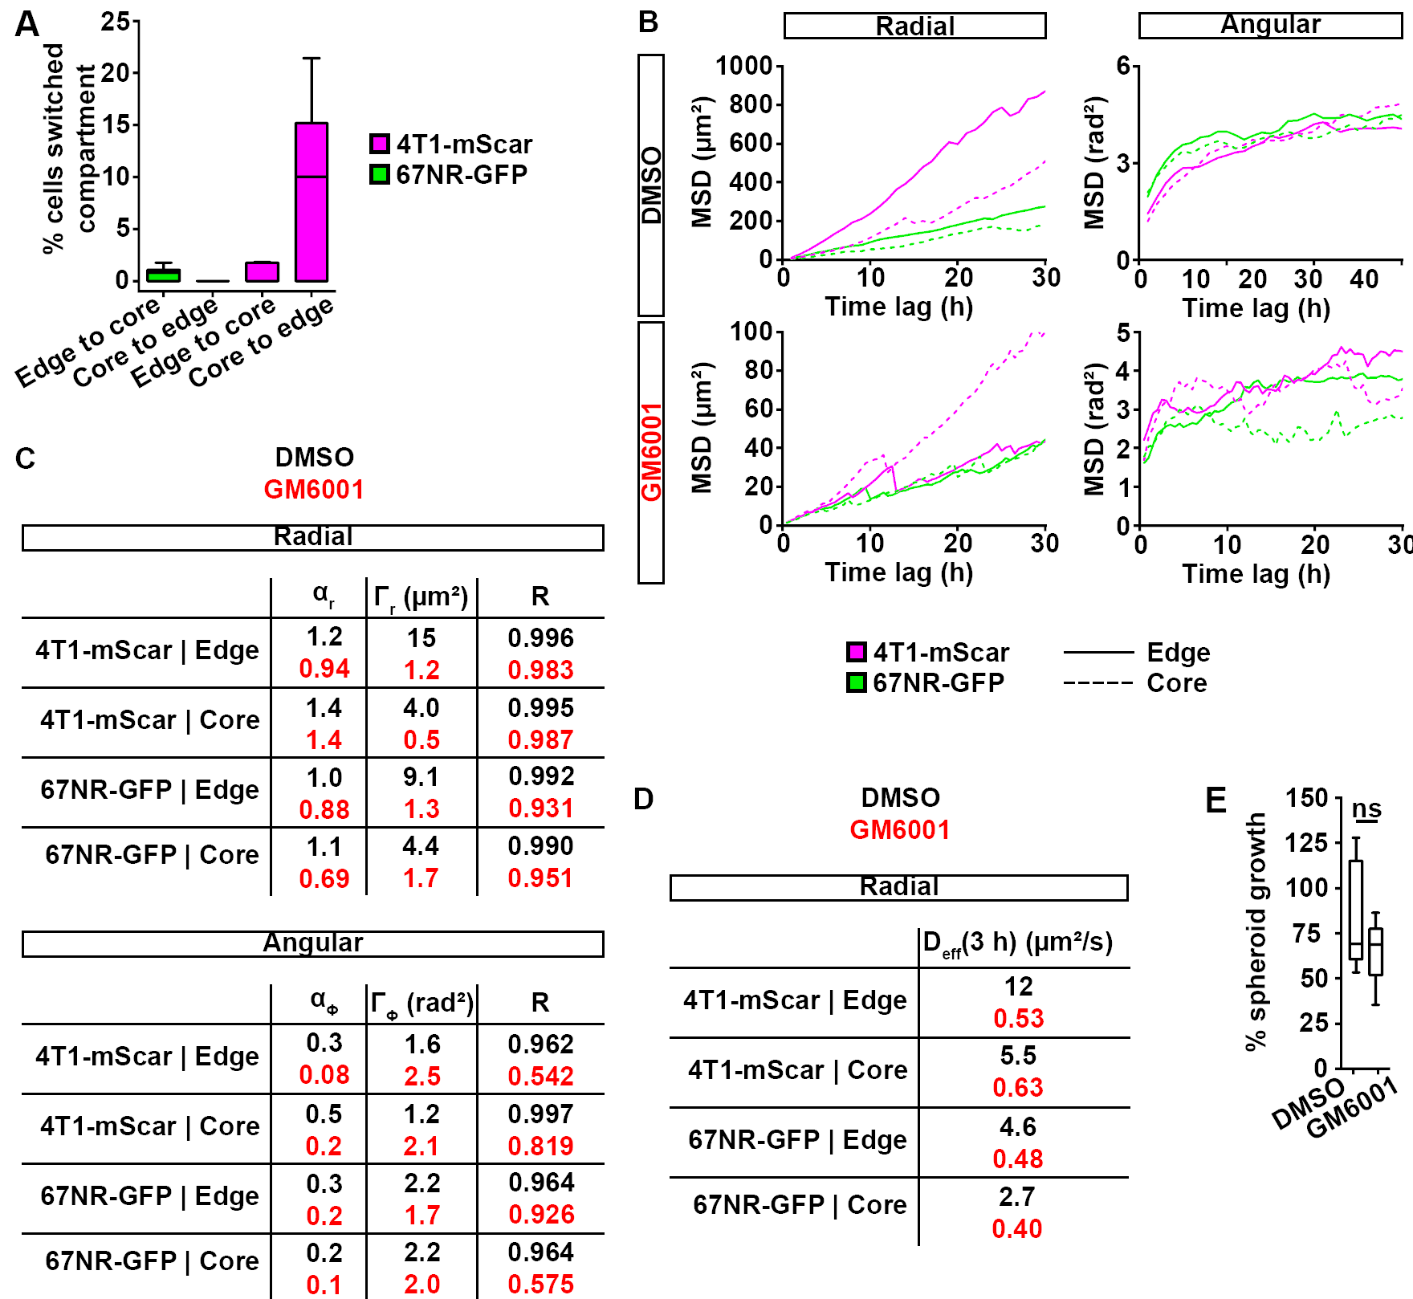


Figure S4. (A) Quantification of the percentage of cells that switched compartments (from edge to core or *vice versa*) for 4T1-mScarlet (4T1-mScar, magenta boxes) and 67NR-GFP (green boxes) cells from Fig. 2H. (B) Mean square displacements (MSDs) for 4T1-mScarlet (4T1-mScar, magenta lines) and 67NR-GFP (green lines) cells from Fig. 2H. MSDs were calculated in the radial (left panels) and angular (right panels) directions of the polar coordinate system, for edge (solid lines) and core (dashed lines) cells in spheroids treated with DMSO (top panels) and GM6001 (bottom panels), respectively. (C) Slope (αr,φ), intercept (Гr,φ) and R (goodness of fit) values for the power law fit to the MSD data fits from (B). See Materials and Methods for details. Values for DMSO-treated spheroids are in black and for GM6001-treated spheroids in red. (D) Effective diffusion coefficient in the radial direction (see Materials and Methods for details) calculated at 3 h based on the values from (B). Values for DMSO-treated spheroids are in black and for GM6001-treated spheroids in red. (E) Quantification of the percentage of spheroid growth over the course of 4 days from Fig. 2A and Fig. 2E. Spheroids were treated from day 0 with a pan-MMP inhibitor (GM6001) or DMSO control. *P*=0.109 was obtained by the two-sample t-test. All data are represented as line graphs or boxplots with median (line), 25th/75th percentiles (boxes) and maximum/minimum (whiskers). Statistical significance was defined as *p<0.05, **p<0.01 and ***p<0.001.

**Figure S5**


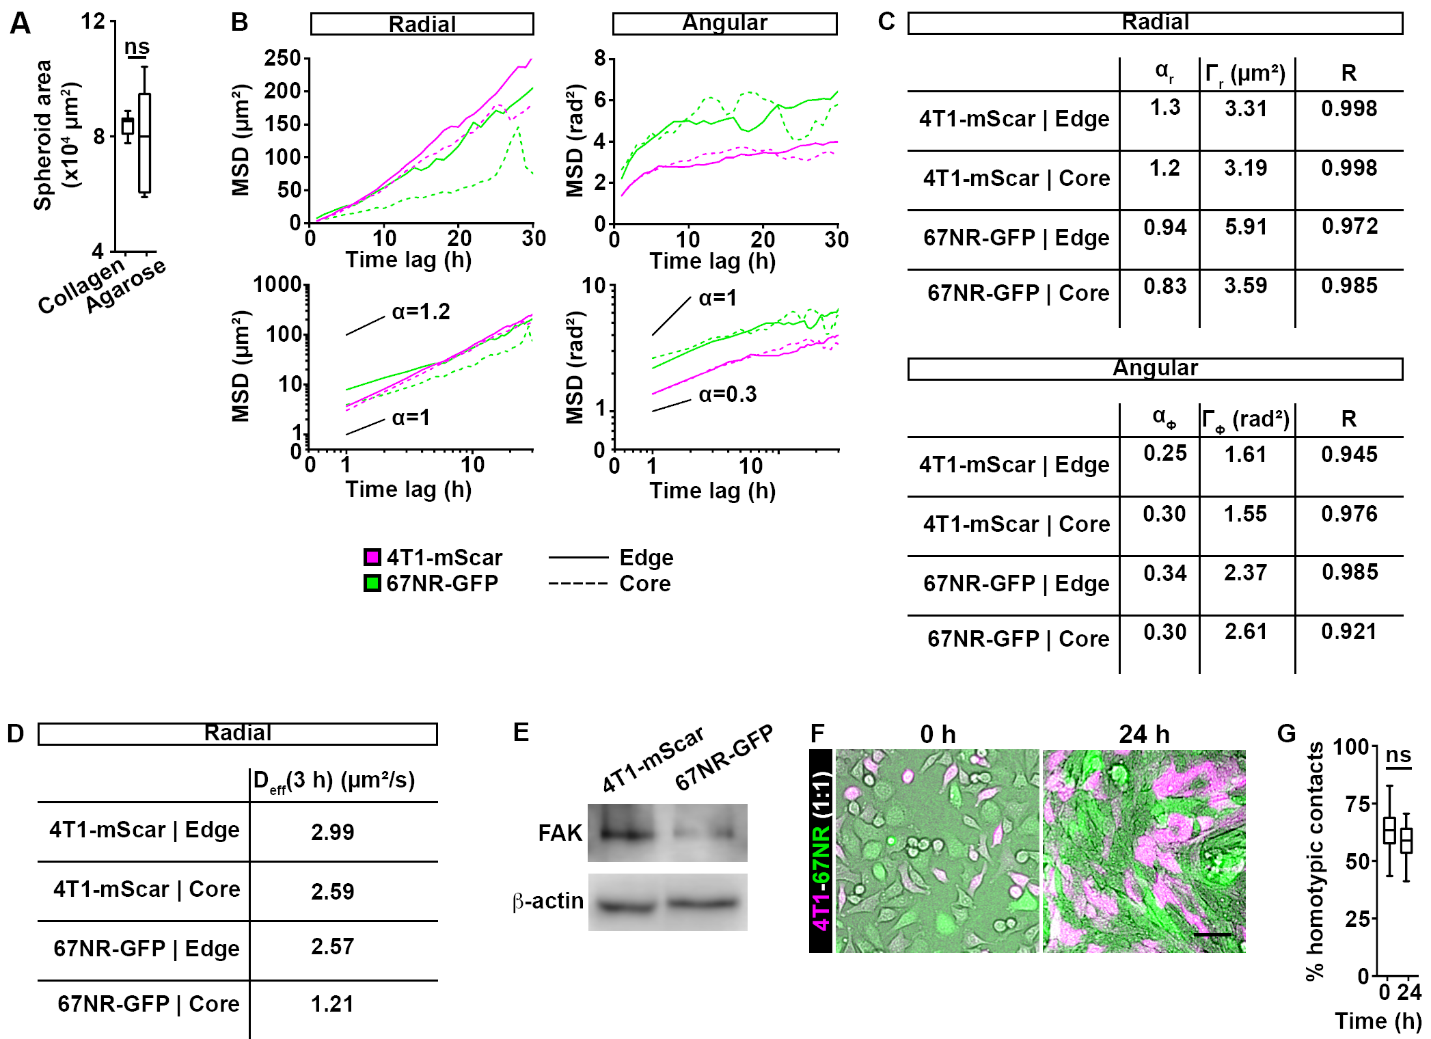


**Figure S5.** (**A**) Quantification of the spheroid area at day 3 post embedding in a 3D collagen I or agarose matrix, from Fig. 2A and Fig. 3A. *P*=0.467 was obtained by the Welch two-sample t-test. (**B**) Mean square displacements (MSDs) for 4T1-mScarlet (4T1-mScar, magenta lines) and 67NR-GFP (green lines) cells from Fig. 3C. MSDs were calculated in the radial (left top panel) and angular (right top panel) directions of the polar coordinate system, for edge (solid lines) and core (dashed lines) cells in spheroids embedded in agarose. The bottom panels correspond to the log-log plots of the top panels, indicating the fundamentally different mechanisms of transport, *i.e.* sub-diffusive for α<1, diffusive for α=1, and super-diffusive for α>1. Solid lines serve as guides to the eye, indicating the average slopes (α values) corresponding to these different motility modalities. (**C**) Slope (αr,φ), intercept (Гr,φ) and R (goodness of fit) values for the power law fit to the MSD data fits from (B). See Materials and Methods for details. (**D**) Effective diffusion coefficient in the radial direction (see Materials and Methods for details) calculated at 3 h based on the values from (B). (**E**) Western blot analysis of FAK expression level in 4T1-mScarlet (4T1-mScar) and 67NR-GFP cells. β-actin is used as a loading control. (**F**) Representative micrographs of cells at 0 h (left panel) and 24 h (right panel) post plating. 4T1-mScarlet (4T1, magenta) and 67NR-GFP (67NR, green) cells were plated on gelatin at a 1:1 ratio. Scale bar: 50 µm. (**G**) Quantification of the percentage of homotypic contacts from (F). *P*=0.236 was obtained by the Welch two-sample t-test. All data are represented as boxplots with median (line), 25th/75th percentiles (boxes) and maximum/minimum (whiskers). Statistical significance was defined as *p<0.05, **p<0.01 and ***p<0.001.


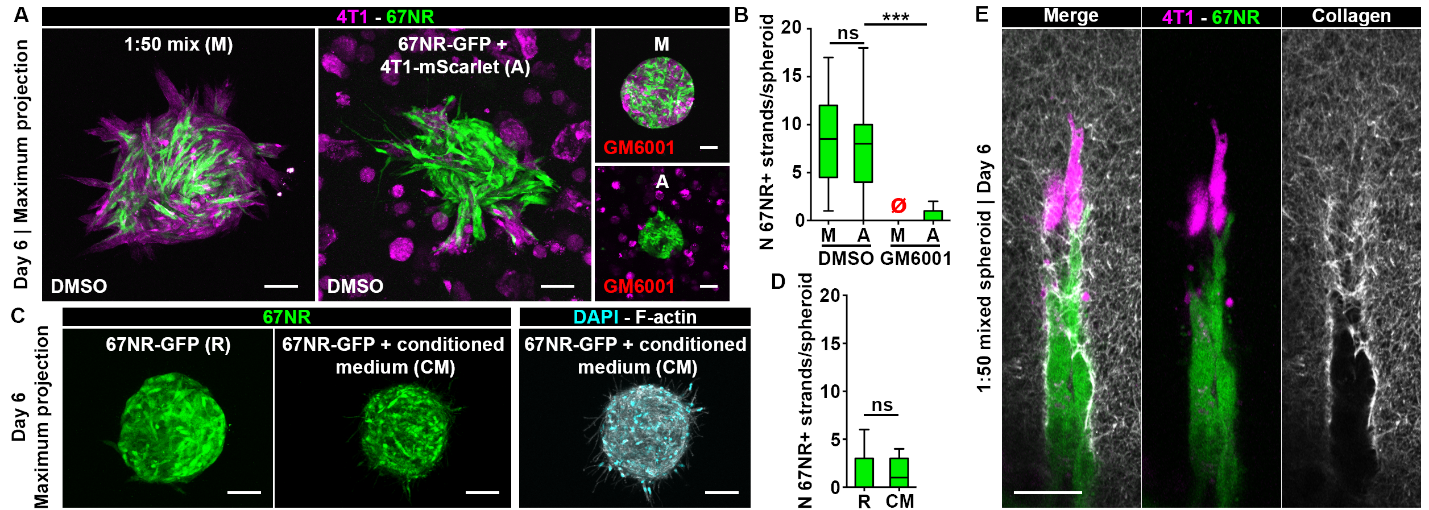
**Figure S6**

**Figure S6.** (**A**) Representative micrographs (maximum projection) of mixed 4T1-mScarlet and 67NR-GFP spheroids (M) or spheroids of 67NR-GFP cells with 4T1-mScarlet cells added in the collagen (A). Mixed spheroids were made at a 1 to 50 ratio of 4T1-mScarlet to 67NR-GFP cells. Spheroids were grown in a 3D collagen I matrix for 6 days. Spheroids were treated from day 0 with a pan-MMP inhibitor (GM6001, right panels) or DMSO control (left panels). Scale bars: 100 µm. (**B**) Quantification of the number of strands containing 67NR cells (67NR+) per spheroid from (A). The red empty symbols indicate zero values. *P*=0.671 was obtained by the t-test and *P*=8.90x10-6 was obtained by the Wilcoxon rank sum test. (**C**) Representative micrographs (maximum projection) of 67NR-GFP spheroids treated with regular medium (R) or conditioned medium (CM) from 4T1-mScarlet cells grown on gelatin. Nuclei (DAPI, cyan) and F-actin (phalloidin, white) were stained. Scale bars: 100 µm. (**D**) Quantification of the number of strands containing 67NR cells (67NR+) per spheroid from (C). *P*=0.218 was obtained by the Wilcoxon rank sum test. (**E**) Representative micrographs (single focal plane) of a strand from a mixed 4T1-mScarlet and 67NR-GFP spheroids. Collagen (white) was labeled. Scale bar: 50 µm.All data are represented as boxplots with median (line), 25th/75th percentiles (boxes) and maximum/minimum (whiskers). Statistical significance was defined as *p<0.05, **p<0.01 and ***p<0.001. Additional information on the metrics and statistics can be found in the Table S1.

**Figure S**
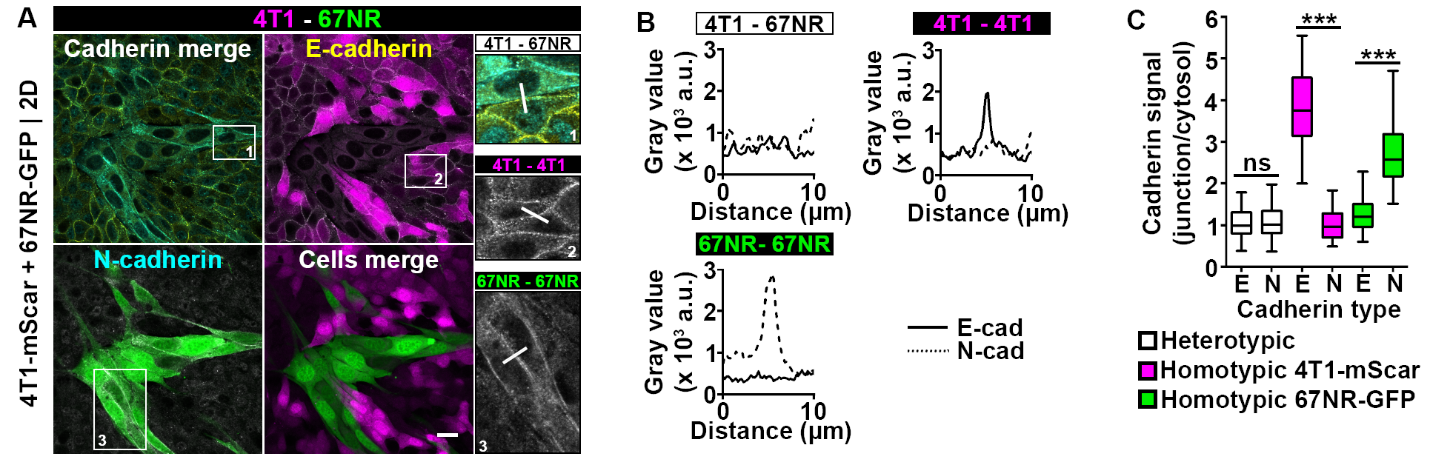
**7**

**Figure S7.** (**A**) Representative micrographs of 4T1-mScarlet and 67NR-GFP cells in 2D, immunolabeled for E/N-cadherin (yellow/cyan). The insets show a 2X zoom-in of the boxed areas 1-3. Scale bar: 20 µm. (**B**) Relative E/N-cadherin (solid/dashed line) signals along the lines in the insets 1-3 from (A). (**C**) Quantification of the junction over cytosol E/N-cadherin signal for homotypic and heterotypic junctions from (B). *P=*0.626, <2.20x10-16 and 4.00x10-14 were obtained by the Wilcoxon rank sum test. All data are represented as boxplots with median (line), 25th/75th percentiles (boxes) and maximum/minimum (whiskers). Statistical significance was defined as *p<0.05, **p<0.01 and ***p<0.001. Additional information on the metrics and statistics can be found in the Table S1.


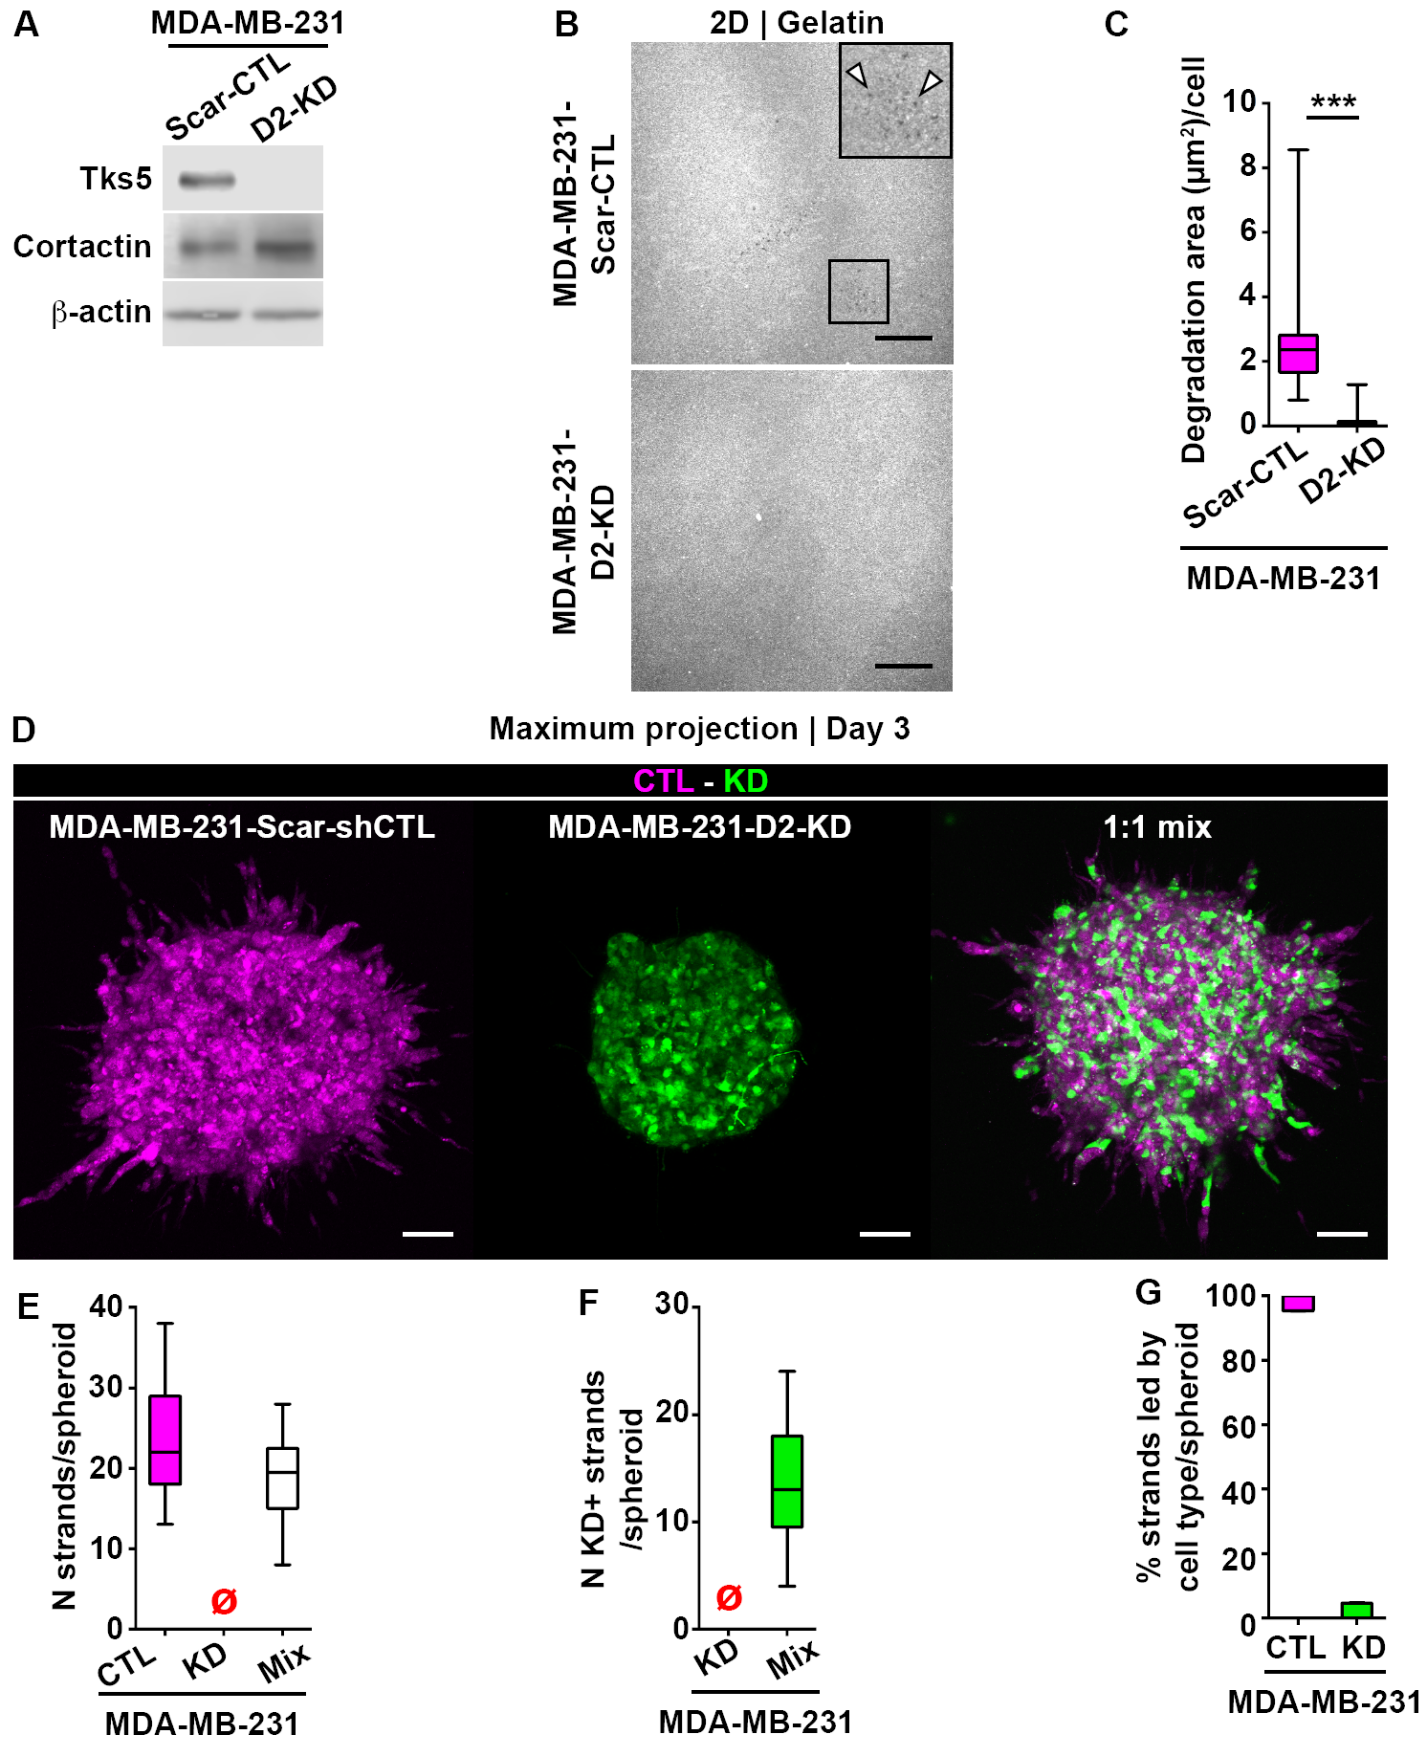
**Figure S8**

**Figure S8**. (**A**) Western blot analysis of Tks5 and cortactin expression levels in MDA-MB-231-mScarlet-shCTL (Scar-CTL) and MDA-MB-231-Dendra2-hTks5 KD (D2-KD) cells. β-actin is used as a loading control. (**B**) Representative micrographs of gelatin degradation for MDA-MB-231-mScarlet-shCTL (Scar-CTL, top panel) and MDA-MB-231-Dendra2-hTks5 KD (D2-KD, bottom panel) cells 18 h after plating. The insets show a 2X zoom-in of the boxed area and arrowheads indicate representative degradation holes. Scale bars: 20 µm. (**C**) Quantification of the degradation area per cell for MDA-MB-231-mScarlet-shCTL (Scar-CTL) and MDA-MB-231-Dendra2-hTks5 KD (D2-KD) cells from (B). *P*<2.20x10-16 was obtained by the Wilcoxon rank sum test. (**D**) Representative micrographs (maximum projection) of spheroids made of a single or mixed MDA-MB-231-mScarlet-shCTL (Scar-CTL) and MDA-MB-231-Dendra2-hTks5 KD (D2-KD) cell line, grown in a 3D collagen I matrix for 3 days. Mixed spheroids were made at a 1 to 1 ratio. Scale bars: 100 µm. (**E-G**) Quantification of the number of strands per spheroid (E), the number of strands containing MDA-MB-231-Dendra2-hTks5 KD cells (KD+) per spheroid (F) and the percentage of strands led by MDA-MB-231-mScarlet-shCTL (CTL) or MDA-MB-231-Dendra2-hTks5 KD (KD) cells (G) for single or mixed spheroids from (D). The red empty symbols indicate zero values. All data are represented as boxplots with median (line), 25th/75th percentiles (boxes) and maximum/minimum (whiskers). Statistical significance was defined as *p<0.05, **p<0.01 and ***p<0.001. Additional information on the metrics and statistics can be found in the Table S1.


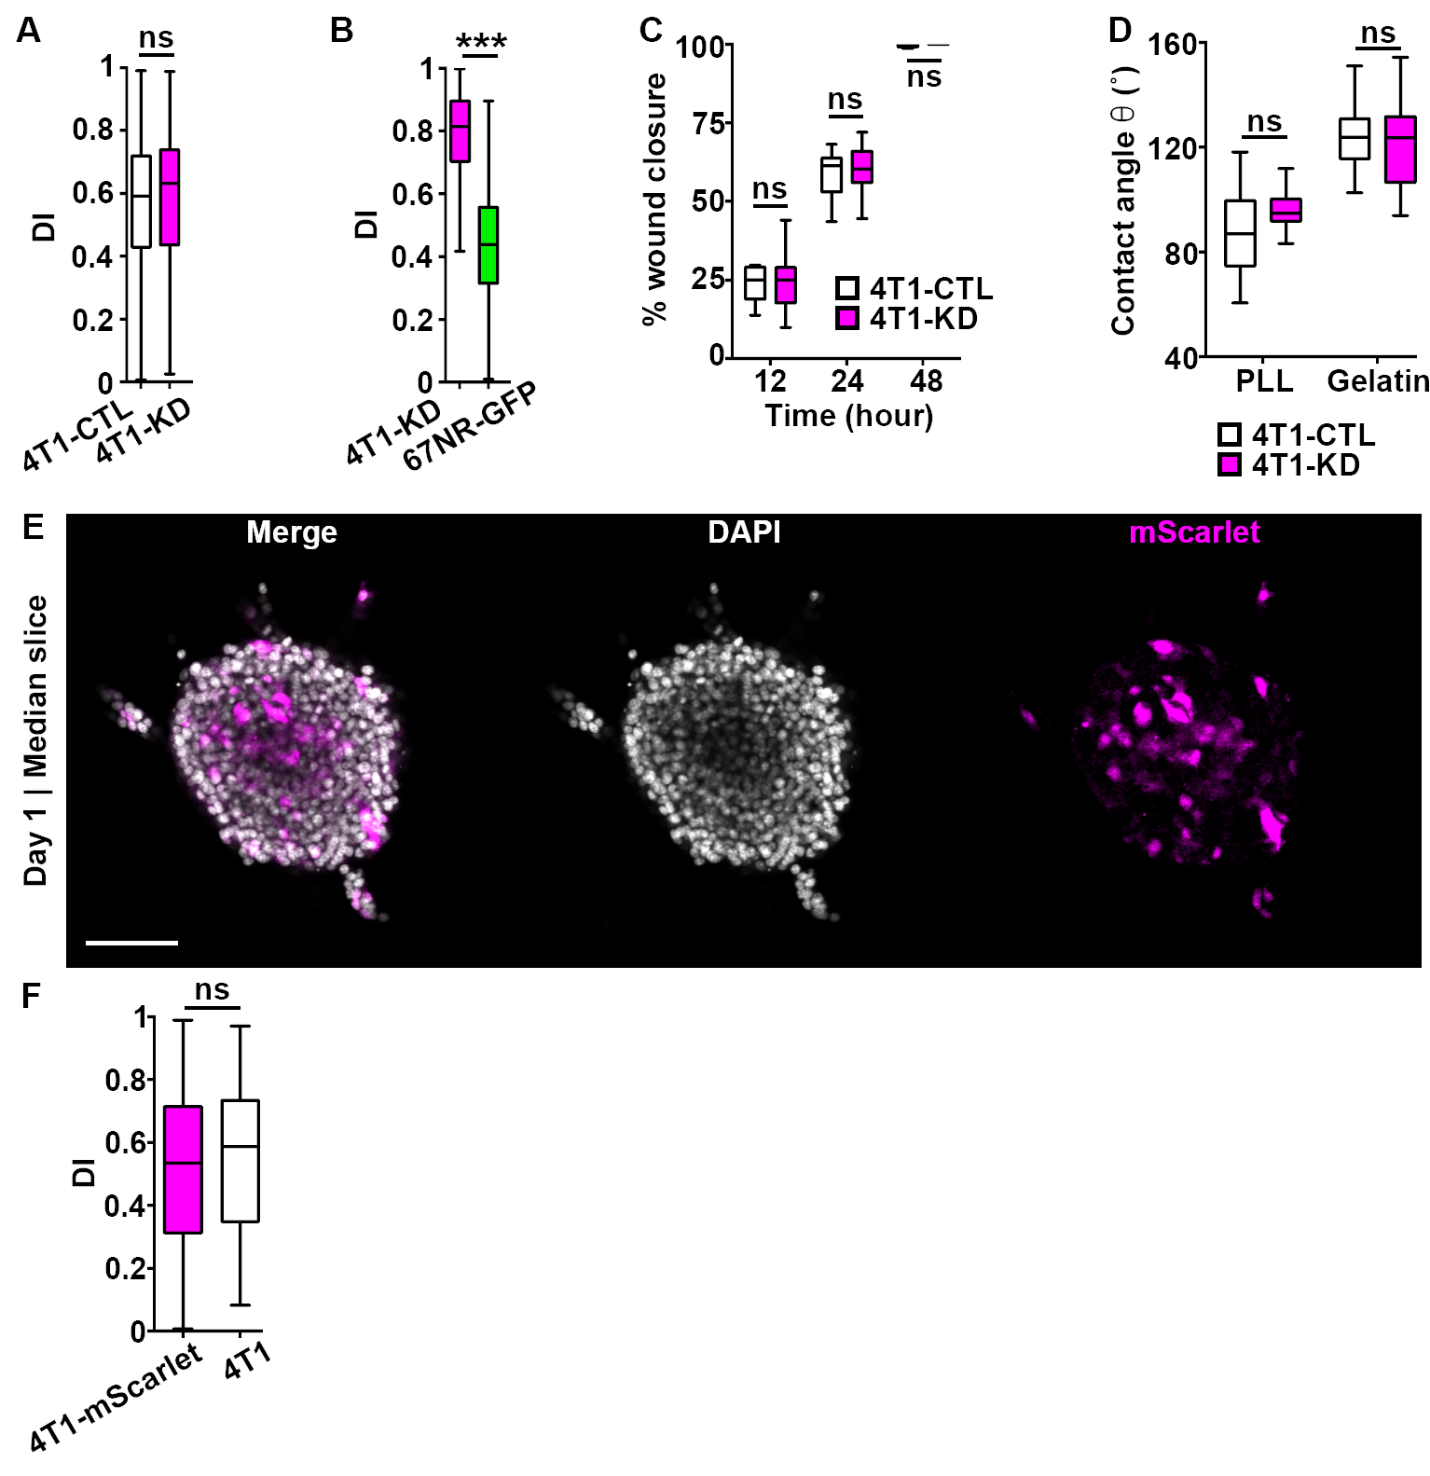
**Figure S9**

**Figure S9.** (**A**) Quantification of the Distance Index (DI; relative distance of each cell to the spheroid center, see Materials and Methods)) for 4T1-CTL (white box) and 4T1-KD (magenta box) cells from Fig. 5D. *P=*0.161 was obtained by the Wilcoxon rank sum test. (**B**) Quantification of the Distance Index (DI) for 4T1-KD (magenta box) and 67NR-GFP (green box) cells from Fig. 5H. *P*<2.20x10-16 was obtained by the Wilcoxon rank sum test. (**C**) Quantification of the percent wound closure for 4T1-CTL (white boxes) and 4T1-KD (magenta boxes) cells over time. *P*=0.973 was obtained by the Wilcoxon rank sum test, 0.977 was obtained by the two-sample t-test and 0.925 was obtained by the Wilcoxon rank sum test. (**D**) Quantification of the contact anglebetween 4T1-CTL (white boxes) or 4T1-KD (magenta boxes) cells and poly-L-lysine (PLL) or gelatin, 5 h post plating. *P*=0.0578 was obtained by the Wilcoxon rank sum test and 0.366 was obtained by the two-sample t-test. (**E**) Representative micrographs (median slice) of a mixed spheroid made of 4T1-mScarlet and 4T1 cells, grown in a 3D collagen I matrix for 1 day. Mixed spheroids were made at a 1 to 1 ratio. Scale bar: 100 µm. (**F**) Quantification of the Distance Index (DI) for 4T1-mScarlet (magenta box) and 4T1 (white box) cells from (E). *P*=0.0698 was obtained by the Wilcoxon rank sum test. Data are represented as boxplots with median (line), 25th/75th percentiles (boxes) and maximum/minimum (whiskers). Statistical significance was defined as *p<0.05, **p<0.01 and ***p<0.001. Additional information on the metrics and statistics can be found in the Table S1.

Table S1. Summary of the experimental variables measured in this study. FOV, field of view; SEM, standard error of the mean.

| Variable (unit) | Mean | Median | SEM | p-value (test) | Data  point | N data points | N independent experiments | Related figure |
| --- | --- | --- | --- | --- | --- | --- | --- | --- |
| **Spheroid area (x 104 µm2)** | | | | | | | | |
| 4T1-DMSO day 0 | 9.91 | 9.30 | 0.8 | - | Spheroid | 9 | 3 | 1A |
| 4T1-DMSO day 2 | 14.4 | 13.9 | 0.7 | 0.000581  (t-test, two-sided) | Spheroid | 13 | 3 |
| 4T1-GM6001 day 2 | 10.4 | 10.1 | 0.5 | 0.000123  (t-test, two-sided) | Spheroid | 13 | 3 |
| 4T1-MitoC day 2 | 12.9 | 13.5 | 0.6 | 0.125  (t-test, two-sided) | Spheroid | 13 | 4 |
| 67NR-DMSO day 0 | 4.03 | 4.05 | 0.2 | - | Spheroid | 6 | 3 |
| 67NR-DMSO day 2 | 4.76 | 4.42 | 0.3 | 0.0571  (t-test, two-sided) | Spheroid | 16 | 4 |
| **Degradation area (µm2/cell)** | | | | | | | | |
| 4T1 | 0.3 | 0.18 | 0.03 | - | FOV | 65 | 3 | 1F |
| 67NR | 0.01 | 0 | 0.004 | <4.40x10-16  (Wilcoxon rank sum test, two-sided) | FOV | 63 | 3 |
| **Instantaneous speed (µm/min)** | | | | | | | | |
| 4T1 | 0.41 | 0.4 | 0.01 | - | Cell | 106 | 3 | 1K |
| 67NR | 0.64 | 0.6 | 0.02 | 1.17x10-13  (Wilcoxon rank sum test, two-sided) | Cell | 104 | 3 |
| **Persistence** | | | | | | | | |
| 4T1 | 0.74 | 0.76 | 0.02 | - | Cell | 106 | 3 | 1L |
| 67NR | 0.46 | 0.44 | 0.02 | <2.20x10-16  (Wilcoxon rank sum test, two-sided) | Cell | 104 | 3 |
| **Relative optical density at 570 nm** | | | | | | | | |
| DMSO | 1.0 | 0.98 | 0.03 | - | Well | 6 | 3 | S1B |
| Mitomycin C | 0.3 | 0.31 | 0.02 | 2.54x10-12  (t-test, two-sided) | Well | 6 | 3 |
| Variable (unit) | Mean | Median | SEM | p-value (test) | Data  point | N data points | N independent experiments | Related figure |
| **E-cadherin signal (junction/cytosol relative gray value)** | | | | | | | | |
| Leader-Follower | 2.69 | 2.36 | 0.35 | - | Line profile | 14  (14 strands, 5 spheroids) | 3 | S2D |
| Follower-Follower | 2.91 | 2.67 | 0.20 | 0.309  (Wilcoxon rank sum test, two-sided) | Line profile | 36  (14 strands, 5 spheroids) | 3 |
| **Distance index (distance cell to spheroid center/spheroid semi major axis)** | | | | | | | | |
| 4T1-mScarlet-Day 1 | 0.60 | 0.63 | 0.02 | - | Cell | 177  (8 spheroids) | 2 | 2D |
| 67NR-GFP-Day 1 | 0.61 | 0.66 | 0.02 | 0.775  (Wilcoxon rank sum, two-sided) | Cell | 168  (8 spheroids) | 2 |
| 4T1-mScarlet-Day 2 | 0.63 | 0.67 | 0.01 | - | Cell | 220  (8 spheroids) | 2 |
| 67NR-GFP-Day 2 | 0.59 | 0.62 | 0.01 | 0.0983  (Wilcoxon rank sum test, two-sided) | Cell | 190  (8 spheroids) | 2 |
| 4T1-mScarlet-Day 3 | 0.73 | 0.76 | 0.01 | - | Cell | 287  (8 spheroids) | 2 |
| 67NR-GFP-Day 3 | 0.61 | 0.63 | 0.01 | 1.32x10-14  (Wilcoxon rank sum test, two-sided) | Cell | 183  (8 spheroids) | 2 |
| 4T1-mScarlet-Day 4 | 0.75 | 0.76 | 0.01 | - | Cell | 305  (8 spheroids) | 2 |
| 67NR-GFP-Day 4 | 0.57 | 0.60 | 0.01 | <2.20 x10-16  (Wilcoxon rank sum test, two-sided) | Cell | 148  (8 spheroids) | 2 |
| **Distance index (distance cell to spheroid center/spheroid semi major axis)** | | | | | | | | |
| 4T1-mScarlet-Day 3-Y27632 | 0.56 | 0.58 | 0.01 | - | Cell | 298  (11 spheroids) | 3 | 2F |
| 67NR-GFP-Day 3-Y27632 | 0.57 | 0.59 | 0.01 | 0.569  (Wilcoxon rank sum, two-sided) | Cell | 418  (11 spheroids) | 3 |
| 4T1-mScarlet-Day 4-Y27632 | 0.55 | 0.53 | 0.01 | - | Cell | 239  (8 spheroids) | 3 |
| Variable (unit) | Mean | Median | SEM | p-value (test) | Data  point | N data points | N independent experiments | Related figure |
| 67NR-GFP-Day 4-Y27632 | 0.56 | 0.53 | 0.01 | 0.929  (Wilcoxon rank sum, two-sided) | Cell | 302  (8 spheroids) | 3 | 2F |
| 4T1-mScarlet-Day 3-GM6001 | 0.60 | 0.65 | 0.01 | - | Cell | 304  (10 spheroids) | 2 |
| 67NR-GFP-Day 3- GM6001 | 0.60 | 0.64 | 0.01 | 0.282  (Wilcoxon rank sum, two-sided) | Cell | 290  (10 spheroids) | 2 |
| 4T1-mScarlet-Day 4-GM6001 | 0.60 | 0.63 | 0.01 | - | Cell | 303  (10 spheroids) | 2 |
| 67NR-GFP-Day 4-GM6001 | 0.58 | 0.63 | 0.01 | 0.428  (Wilcoxon rank sum, two-sided) | Cell | 418  (11 spheroids) | 2 |
| **distance index (distance index for the cell’s last position - distance index for the cell’s first position)** | | | | | | | | |
| 4T1-mScarlet-Edge-DMSO | -0.003 | -0.001 | 0.003 | - | Cell | 478  (6 spheroids) | 2 | 2I |
| 4T1-mScarlet-Core-DMSO | 0.02 | 0.01 | 0.009 | 0.0204  (Wilcoxon rank sum, two-sided) | Cell | 107  (6 spheroids) | 2 |
| 67NR-GFP-Edge-DMSO | -0.01 | -0.009 | 0.002 | - | Cell | 719  (6 spheroids) | 2 |
| 67NR-GFP-Core-DMSO | -0.01 | -0.009 | 0.003 | 0.747  (Wilcoxon rank sum test, two-sided) | Cell | 350  (6 spheroids) | 2 |
| **distance index (distance index for the cell’s last position - distance index for the cell’s first position)** | | | | | | | | |
| 4T1-mScarlet-Edge-GM6001 | -0.01 | -0.006 | 0.002 | - | Cell | 181  (4 spheroids) | 1 | 2I |
| 4T1-mScarlet-Core-GM6001 | -0.009 | -0.006 | 0.004 | 0.844  (Wilcoxon rank sum, two-sided) | Cell | 143  (4 spheroids) | 1 |
| 67NR-GFP-Edge-GM6001 | -0.01 | -0.006 | 0.003 | - | Cell | 227  (4 spheroids) | 1 |
| 67NR-GFP-Core-GM6001 | -0.02 | -0.01 | 0.004 | 0.107  (Wilcoxon rank sum test, two-sided) | Cell | 124  (4 spheroids) | 1 |
| Variable (unit) | Mean | Median | SEM | p-value (test) | Data  point | N data points | N independent experiments | Related figure |
| **Distance index (distance spheroid center to cell/spheroid semi major axis)** | | | | | | | | |
| 4T1-mScarlet -Day 3 | 0.59 | 0.62 | 0.01 | - | Cell | 286  (10 spheroids) | 3 | 3B |
| 67NR-GFP-Day 3 | 0.60 | 0.63 | 0.01 | 0.322  (Wilcoxon rank sum test, two-sided) | Cell | 305  (10 spheroids) | 3 |
| 4T1-mScarlet -Day 4 | 0.54 | 0.56 | 0.01 | - | Cell | 287  (12 spheroids) | 3 |
| 67NR-GFP-Day 4 | 0.59 | 0.62 | 0.01 | 0.999  (Wilcoxon rank sum test, one-sided) | Cell | 342  (12 spheroids) | 3 |
| **distance index (distance index for the cell’s last position - distance index for the cell’s first position)** | | | | | | | | |
| 4T1-mScarlet-Edge | -0.03 | -0.02 | 0.004 | - | Cell | 333  (6 spheroids) | 2 | 3D |
| 4T1-mScarlet-Core | -0.009 | -0.006 | 0.005 | 0.000750  (Wilcoxon rank sum, two-sided) | Cell | 253  (6 spheroids) | 2 |
| **% Cell type on PLL** | | | | | | | | |
| 4T1-mScarlet | 15.69 | 18.24 | 2.62 | - | Cell | 639 | 3 | 3F |
| 67NR-GFP | 84.31 | 81.76 | 2.62 | - | Cell | 2753 | 3 |
| **Contact angle ** | | | | | | | | |
| 4T1-mScarlet-PLL | 76.32 | 74.8 | 2 | - | Cell | 30 | 3 | 3H |
| 67NR-GFP-PLL | 112.9 | 117 | 4 | 1.25x10-9  (Wilcoxon rank sum test, two-sided) | Cell | 30 | 3 |
| 4T1-mScarlet-Gelatin | 104.8 | 101 | 3 | 4.13x10-10  (Wilcoxon rank sum test, two-sided) | Cell | 30 | 3 |
| 67NR-GFP-Gelatin | 107.2 | 101 | 3 | 0.0571  (Wilcoxon rank sum test, two-sided, *vs.* 67NR-GFP-PLL)  0.563  (Wilcoxon rank sum test, two-sided, *vs.* 4T1-mScarlet-Gelatin) | Cell | 26 | 3 |
| Variable (unit) | Mean | Median | SEM | p-value (test) | Data  point | N data points | N independent experiments | Related figure |
| **% Cells switched compartment** | | | | | | | | |
| 67NR-GFP | Edge to core | 0.64 | - | - | - | Cell | 478  (6 spheroids) | 2 | S4A |
| 67NR-GFP | Core to edge | 0.36 | - | - | - | Cell | 107  (6 spheroids) | 2 |
| 4T1-mScar | Edge to core | 0.11 | - | - | - | Cell | 719  (6 spheroids) | 2 |
| 4T1-mScar | Core to edge | 9.0 | - | - | - | Cell | 350  (6 spheroids) | 2 |
| **% Spheroid growth** | | | | | | | | |
| DMSO | 83.86 | 69.15 | 11 | - | Spheroid | 8 | 2 | S4E |
| GM6001 | 65.06 | 68.77 | 5 | 0.109  (Two sample t-test, two-sided) | Spheroid | 10 | 2 |
| **Spheroid area (x104 µm²)** | | | | | | | | |
| Collagen | 8.39 | 8.53 | 0.13 | - |  | 8 | 2 | S5A |
| Agarose | 7.98 | 7.99 | 0.53 | 0.467  (Welch two sample t-test, two-sided) | Cell-cell contact | 953 (18 FOVs) | 3 |
| **% Homotypic contacts** | | | | | | | | |
| 0 h | 61.97 | 63.33 | 2.80 | - | Cell-cell contact | 487 (18 FOVs) | 3 | S5G |
| 24 h | 58.03 | 58.82 | 1.64 | 0.236  (Welch two sample t-test, two-sided) | Cell-cell contact | 953 (18 FOVs) | 3 |
| **N strands/spheroid** | | | | | | | | |
| 4T1-mScarlet-DMSO | 15.7 | 17 | 0.92 |  | Spheroid | 7 | 2 | 4B |
| 67NR-GFP-DMSO | 1.61 | 0 | 0.71 | - | Spheroid | 18 | 4 |
| Mix-DMSO | 23.6 | 24 | 2.2 | 1.90x10-7  (Wilcoxon rank sum test, two-sided ) | Spheroid | 20 | 4 |
| Mix-GM6001 | 0 | 0 | 0 |  | Spheroid | 17 | 3 |
| Variable (unit) | Mean | Median | SEM | p-value (test) | Data  point | N data points | N independent experiments | Related figure |
| **N 67NR+ strands/spheroid** | | | | | | | | |
| 67NR-GFP-DMSO | 1.6 | 0 | 0.71 | - | Spheroid | 18 | 4 | 4C |
| Mix-DMSO | 8.6 | 8.5 | 1.1 | 9.86x10-6  (Wilcoxon rank sum test, two-sided) | Spheroid | 20 | 4 |
| Mix-GM6001 | 0 | 0 | 0 |  | Spheroid | 17 | 3 |
| **% Strands led by cell type/spheroid** | | | | | | | | |
| 4T1-mScarlet | 96.58 | 100 | 1.25 | - | Spheroid | 20 | 4 | 4D |
| 67NR-GFP | 3.41 | 0 | 1.25 | - | Spheroid | 20 | 4 |
| **Distance index (distance spheroid center to cell/spheroid semi major axis) – Strands excluded** | | | | | | | | |
| 4T1-mScarlet-DMSO-Day 6 | 0.81 | 0.83 | 0.004 | - | Cell | 610  (21 spheroids) | 4 | 4G |
| 67NR-GFP-DMSO-Day 6 | 0.59 | 0.59 | 0.008 | <2.20 x10-16  (Wilcoxon rank sum test, two-sided) | Cell | 391  (21 spheroids) | 4 |
| 4T1-mScarlet-GM6001-Day 6 | 0.59 | 0.63 | 0.006 | - | Cell | 790  (17 spheroids) | 3 |
| 67NR-GFP-GM6001-Day 6 | 0.57 | 0.60 | 0.007 | 0.0665  (Wilcoxon rank sum test, two-sided) | Cell | 787  (17 spheroids) | 3 |
| **Distance index (distance spheroid center to cell/spheroid semi major axis) – Strands included** | | | | | | | | |
| 4T1-mScarlet-DMSO-Day 6 | 0.98 | 0.88 | 0.01 | - | Cell | 940  (21 spheroids) | 4 | 4G |
| 67NR-GFP-DMSO-Day 6 | 0.71 | 0.67 | 0.01 | <2.20x10-16  (Wilcoxon rank sum test, two-sided) | Cell | 540  (21 spheroids) | 4 |
| Variable (unit) | Mean | Median | SEM | p-value (test) | Data  point | N data points | N independent experiments | Related figure |
| **N 67NR+ strand/spheroid** | | | | | | | | |
| Mix-DMSO-GFP | 8.6 | 9 | 1.1 | - | Spheroid | 20 | 4 | S6B |
| 67NR-GFP + 4T1-mScarlet-DMSO | 7.9 | 8 | 1.1 | 0.671  (t-test, two-sided) | Spheroid | 18 | 4 |
| Mix-GM6001-GFP | 0 | 0 | 0 |  | Spheroid | 17 | 3 |
| 67NR-GFP + 4T1-mScarlet-GM6001 | 0.57 | 0 | 0.25 | 8.90x10-6  (Wilcoxon rank sum test, two-sided, *vs.* DMSO) | Spheroid | 14 | 2 |
| **N 67NR+ strand/spheroid** | | | | | | | | |
| 67NR-GFP | 1.61 | 0 | 0.71 | - | Spheroid | 19 | 4 | S6D |
| 67NR-GFP + CM | 1.57 | 1 | 0.57 | 0.218  (Wilcoxon rank sum test, two-sided) | Spheroid | 7 | 2 |
| **Cadherin signal (junction/cytosol)** | | | | | | | | |
| Heterotypic-Ecad | 1.1 | 0.98 | 0.07 | - | Line profile | 39  (21 FOVs) | 2 | S7C |
| Heterotypic-Ncad | 1.1 | 1.0 | 0.09 | 0.626  (Wilcoxon rank sum test, one-sided) | Line profile | 39  (21 FOVs) | 2 |
| 4T1-Homotypic-Ecad | 4.0 | 3.8 | 0.3 | - | Line profile | 39  (21 FOVs) | 2 |
| 4T1-Homotypic-Ncad | 0.99 | 0.96 | 0.05 | <2.20 x10-6  (Wilcoxon rank sum test, two-sided) | Line profile | 39  (21 FOVs) | 2 |
| 67NR-Homotypic-Ecad | 1.3 | 1.2 | 0.08 | - | Line profile | 38  (21 FOVs) | 2 |
| 67NR-Homotypic-Ncad | 2.8 | 2.6 | 0.1 | 4.00x10-14 (Wilcoxon rank sum test, one-sided) | Line profile | 38  (21 FOVs) | 2 |
| **Degradation area (µm2/cell)** | | | | | | | | |
| 4T1-CTL | 0.3 | 0.22 | 0.01 | - | FOV | 60 | 3 | 5C |
| 4T1-KD | 0.04 | 0 | 0.05 | 7.24x10-14  (Wilcoxon rank sum test, two-sided) | FOV | 60 | 3 |
| Variable (unit) | Mean | Median | SEM | p-value (test) | Data  point | N data points | N independent experiments | Related figure |
| **N strands/spheroid** | | | | | | | | |
| 4T1-CTL | 16 | 13 | 0.51 |  | Spheroid | 15 | 3 | 5E |
| 4T1-KD | 3 | 3 | 0.38 | <2.20x10-16  (t-test, two-sided) | Spheroid | 15 | 3 |
| Mix | 15 | 15 | 1.1 | 7.26x10-7  (Welch two-sample t-test, two-sided, *vs.* 4T1-KD)  0.380  (Welch two-sample t-test, two-sided, *vs.* 4T1-CTL) | Spheroid | 10 | 3 |
| **N KD+ strands/spheroid** | | | | | | | | |
| 4T1-KD | 3.1 | 3 | 0.4 | - | Spheroid | 15 | 3 | 5F |
| Mix | 15 | 9 | 15 | 8.49x10-7  (Welch two sample t-test, two-sided) | Spheroid | 10 | 3 |
| **% Strands led by cell type/spheroid** | | | | | | | | |
| 4T1-CTL | 98.2 | 100 | 0.74 | - | Spheroid | 10 | 3 | 5G |
| 4T1-KD | 1.77 | 0 | 0.74 | - | Spheroid | 10 | 3 |
| **N strands/spheroid** | | | | | | | | |
| WT-Mix | 23.6 | 24 | 2.2 | - | Spheroid | 20 | 4 | 5I |
| KD-Mix | 2.92 | 2 | 0.78 | 3.36x10-6  (Wilcoxon rank sum test, two-sided) | Spheroid | 13 | 3 |
| **N colonies/cm²** | | | | | | | | |
| 4T1 | 2.2 | 0.72 | 1.9 | - | Mice | 3 | - | 5J |
| 67NR | 0 | 0 | 0 | 0.0104  (Wilcoxon rank sum test, two-sided) | Mice | 5 | - |
| Variable (unit) | Mean | Median | SEM | p-value (test) | Data  point | N data points | N independent experiments | Related figure |
| 4T1-CTL | 4.0 | 3.9 | 1.7 | - | Mice | 4 | - | 5J |
| 4T1-KD | 0.026 | 0 | 0.030 | 0.0323  (Wilcoxon rank sum test, two-sided) | Mice | 3 | - |
| **Relative N colonies (non-met/met)** | | | | | | | | |
| 4T1 + 67NR | 0.3 | 0 | 0.03 | - | Mice | 5 | - | 5J |
| 4T1 + 4T1-KD | 0.5 | 0.47 | 0.2 | 0.0250  (Wilcoxon rank sum test, two-sided) | Mice | 4 | - |
| 4T1-CTL + 4T1-KD | 0.6 | 0.33 | 0.3 | 0.0262  (Wilcoxon rank sum test, one-sided) | Mice | 5 | - |
| **Degradation area (µm2/cell)** | | | | | | | | |
| MDA-MB-231-mScar-CTL | 2.6 | 2 | 0.2 | - | FOV | 58 | 3 | S8C |
| MDA-MB-231-D2-KD | 0.11 | 0.05 | 0.02 | <2.20x10-16  (Wilcoxon rank sum test, two-sided) | FOV | 60 | 3 |
| **N strands/spheroid** | | | | | | | | |
| MDA-MB-231-mScarlet-shCTL | 23.87 | 22 | 1.9 | - | Spheroid | 15 | 3 | S8E |
| MDA-MB-231-Dendra2-KD | 0 | 3 | 0.10 | - | Spheroid | 13 | 4 |
| Mix | 18.75 | 20 | 1.8 | - | Spheroid | 12 | 3 |
| **N KD+ strands/spheroid** | | | | | | | | |
| MDA-MB-231-Dendra2-KD | 0 | 3 | 0.10 | - | Spheroid | 13 | 4 | S8F |
| Mix | 13.67 | 13 | 1.8 | - | Spheroid | 12 | 3 |
| **% Strands led by cell type/spheroid** | | | | | | | | |
| MDA-MB-231-mScarlet-shCTL | 96.8 | 100 | 1.43 | - | Spheroid | 12 | 3 | S8G |
| MDA-MB-231-Dendra2-KD | 3.25 | 0 | 1.43 | - | Spheroid | 12 | 3 |
| Variable (unit) | Mean | Median | SEM | p-value (test) | Data  point | N data points | N independent experiments | Related figure |
| **Distance index (distance spheroid center to cell/spheroid semi major axis)** | | | | | | | | |
| 4T1-CTL | 0.57 | 0.59 | 0.01 | - | Cell | 484  (10 spheroids) | 3 | S9A |
| 4T1-KD | 0.58 | 0.63 | 0.01 | 0.161  (Wilcoxon rank sum test, two-sided) | Cell | 503  (10 spheroids) | 3 |
| **Distance index (distance spheroid center to cell/spheroid semi major axis)** | | | | | | | | |
| 4T1-KD | 0.79 | 0.81 | 0.01 | - | Cell | 572  (13 spheroids) | 3 | S9B |
| 67NR-GFP | 0.43 | 0.44 | 0.01 | <2.20x10-16  (Wilcoxon rank sum test, two-sided) | Cell | 419  (13 spheroids) | 3 |
| **% Wound closure** | | | | | | | | |
| 4T1-CTL-12 h | 24.96 | 25 | 3.1 | - | FOV | 11  (11 wells) | 3 | S9C |
| 4T1-KD-12 h | 25.09 | 25 | 3.3 | 0.973  (Wilcoxon rank sum test, two-sided) | FOV | 10  (10 wells) | 3 |
| 4T1-CTL-24 h | 58.36 | 61 | 2.2 | - | Cell | 11  (11 wells) | 3 |
| 4T1-KD-24 h | 60.37 | 59 | 2.9 | 0.977  (Two sample t-test, two-sided) | FOV | 10  (10 wells) | 3 |
| 4T1-CTL-48 h | 99.38 | 100 | 0.43 | - | Cell | 11  (11 wells) | 3 |
| 4T1-KD-48 h | 97.94 | 100 | 1.4 | 0.925  (Wilcoxon rank sum test, two-sided) | FOV | 10  (10 wells) | 3 |
| **Contact angle ** | | | | | | | | |
| 4T1-CTL-PLL | 87.27 | 86.84 | 3 | - | Cell | 26 | 3 | S9D |
| 4T1-KD-PLL | 87.27 | 94.71 | 2 | 0.0578  (Wilcoxon rank sum test, two-sided) | Cell | 21 | 2 |
| 4T1-CTL-Gelatin | 124.2 | 123.9 | 2 | - | Cell | 31 | 3 |
| 4T1-KD-Gelatin | 121.0 | 123.5 | 3 | 0.366  (Two sample t-test, two-sided) | Cell | 31 | 3 |
| Variable (unit) | Mean | Median | SEM | p-value (test) | Data  point | N data points | N independent experiments | Related figure |
| **Distance index (distance spheroid center to cell/spheroid semi major axis)** | | | | | | | | |
| 4T1-mScarlet | 0.513 | 0.535 | 0.014 | - | Cell | 299  (9 spheroids) | 2 | S9F |
| 4T1 | 0.551 | 0.587 | 0.014 | 0.0698  (Wilcoxon rank sum test, two-sided) | Cell | 280  (9 spheroids) | 2 |

Movie S1.

Time lapse of a 4T1 (top panel) and a 67NR (bottom panel) monolayer in the scratch assay. Time is in hh:mm. Scale bar: 100 µm.

**Movie S2.**

Confocal z stack of a mixed 4T1-mScarlet (magenta) and 67NR-GFP (green) spheroid grown in a 3D collagen I matrix for 3 days. Scale bar: 100 µm.

**Movie S3.**

Time lapse of 4T1-mScarlet cells in a mixed spheroid embedded in collagen I. Spheroids were treated from day 0 with DMSO control. 67NR-GFP cells are not shown to ease visualization. The left panel shows all trajectories, the middle panel shows a representative core trajectory (from edge to core) and the right panel shows a representative edge trajectory (from edge to edge). Time is in hh:mm. Scale bar: 100 µm.

**Movie S4.**

Time lapse of 67NR-GFP cells in a mixed spheroid embedded in collagen I. Spheroids were treated from day 0 with DMSO control. 4T1-mScarlet cells are not shown to ease visualization. The left panel shows all trajectories, the middle panel shows a representative core trajectory (from core to edge) and the right panel shows a representative edge trajectory (from edge to edge). Time is in hh:mm. Scale bar: 100 µm.

**Movie S5.**

Time lapse of 4T1-mScarlet cells in a mixed spheroid embedded in collagen I. Spheroids were treated from day 0 with GM6001. 67NR-GFP cells are not shown to ease visualization. The left panel shows edge trajectories and the right panel shows edge trajectories. Time is in hh:mm. Scale bar: 100 µm.

**Movie S6.**

Time lapse of 67NR-GFP cells in a mixed spheroid embedded in collagen I. Spheroids were treated from day 0 with GM6001. 4T1-mScarlet cells are not shown to ease visualization. The left panel shows edge trajectories and the right panel shows edge trajectories. Time is in hh:mm. Scale bar: 100 µm.

**Movie S7.**

Time lapse of 4T1-mScarlet cells in a mixed spheroid embedded in agarose. 67NR-GFP cells are not shown to ease visualization. Representative trajectories are shown. Time is in hh:mm. Scale bar: 100 µm.

**Movie S8.**

Time lapse of 4T1-mScarlet cells in a mixed spheroid embedded in agarose. 67NR-GFP cells are not shown to ease visualization. Representative edge trajectories are shown to illustrate the inward movement of cells. Time is in hh:mm. Scale bar: 100 µm.

**Movie S9.**

Time lapse of 4T1-mScarlet cells in a mixed spheroid embedded in agarose. 67NR-GFP cells are not shown to ease visualization. A representative core trajectory is shown to illustrate a cell reaching then leaving the edge compartment. Time is in hh:mm. Scale bar: 100 µm.

**Movie S10.**

Time lapse of 4T1-mScarlet (gray) cells at the gelatin/poly-L-lysine interface (red line). A cell that crossed the interface and migrated back to the gelatin layer is indicated with a yellow arrowhead. Time is in hh:mm. Scale bar: 50 µm.
